# Supplementary material for: A highly selective dual-therapeutic nanosystem for simultaneous anticancer and antiangiogenesis therapy
Source: Royal Society of Chemistry journal article supplement (doi:10.1039/c7tb02163a), 2017-01-01
Supplement: c7tb02163a1.pdf [file c7tb02163a1.pdf]

## Supporting Information

for

### Highly Selective Dual-therapeutic Nanosystem for Simultaneous Anticancer and Antiangiogenesis

Lizhen He<sup>a</sup>, Yanyu Huang<sup>a</sup>, Yanzhou Chang<sup>a</sup>, Yuanyuan You<sup>a</sup>, Hao Hu<sup>a</sup>, Kam W. Leong<sup>\*b</sup> and Tianfeng Chen<sup>\*a</sup>

#### Results:

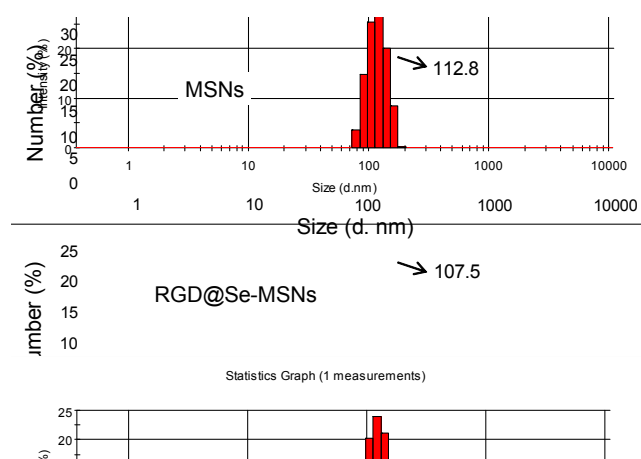

**Figure S1.** Size distribution of MSNs and RGD@Se-MSNs.

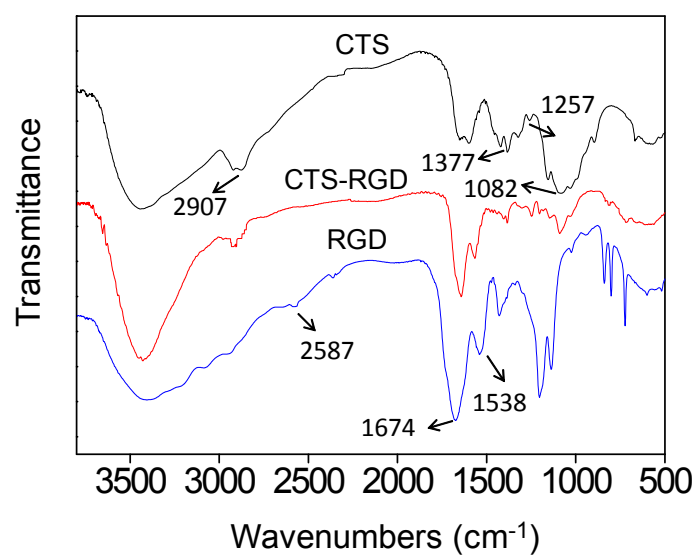

**Figure S2.** FTIR spectra of CTS, CTS-RGD and RGD.

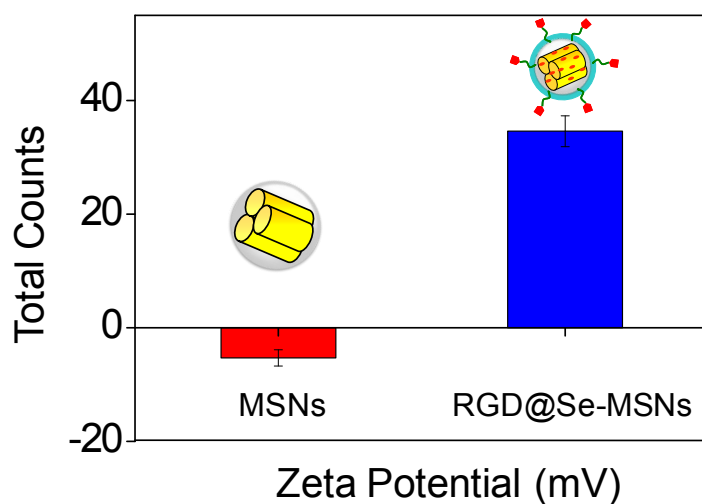

**Figure S3.** Zeta potentials of MSNs and RGD@Se-MSNs.

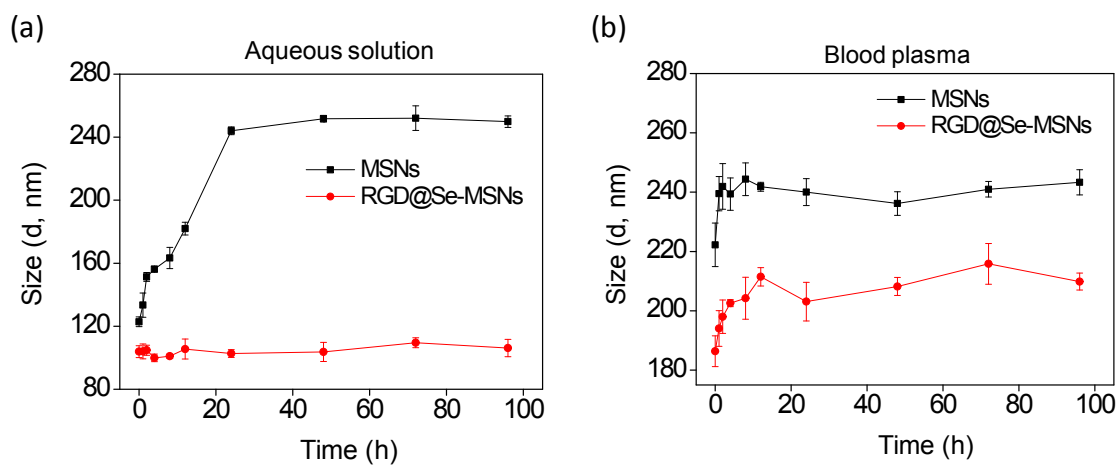

**Figure S4.** Stability of MSNs and RGD@Se-MSNs nanoparticles in aqueous solution and blood plasma.

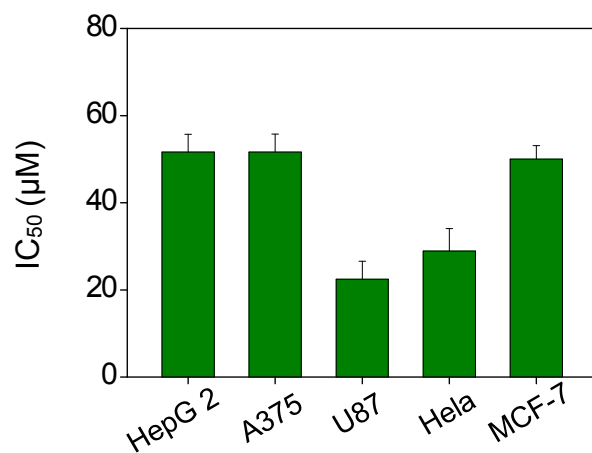

**Figure S5.** The  $IC_{50}$  value of SeC on human cancer cells (72-h treatment). Values expressed are means  $\pm$  SD of triplicates.

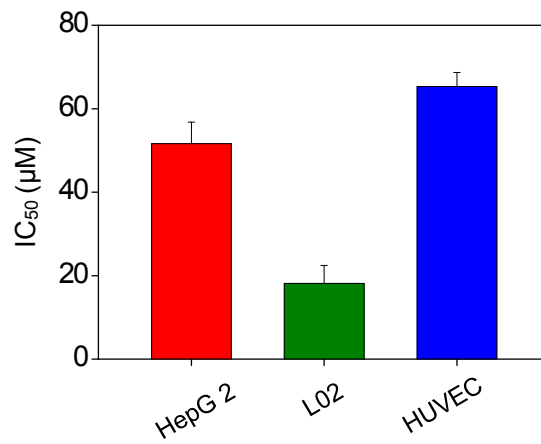

**Figure S6.** Comparison of the IC<sub>50</sub> value of SeC on HepG-2, L02 and HUVEC cells after 72-h incubation.

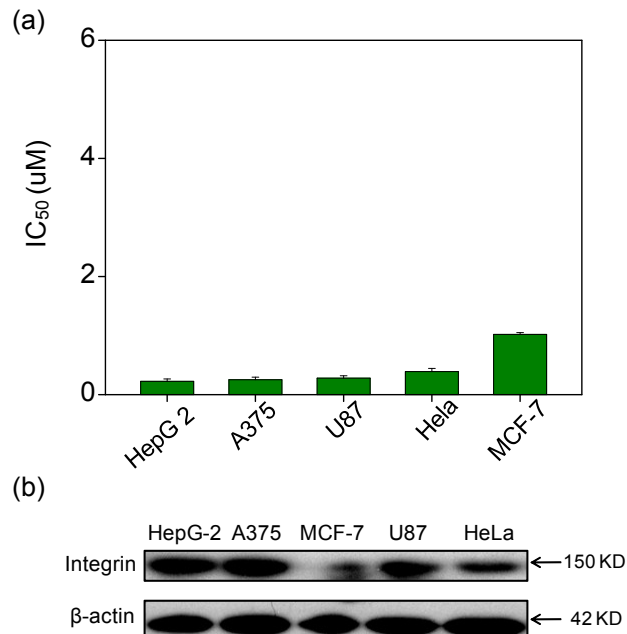

**Figure S7.** (a) The IC<sub>50</sub> value of RGD@Se-MSNs on human cancer cells (72-h treatment). (b) Western blotting showing the different expression levels of integrin in various human cancer cells.

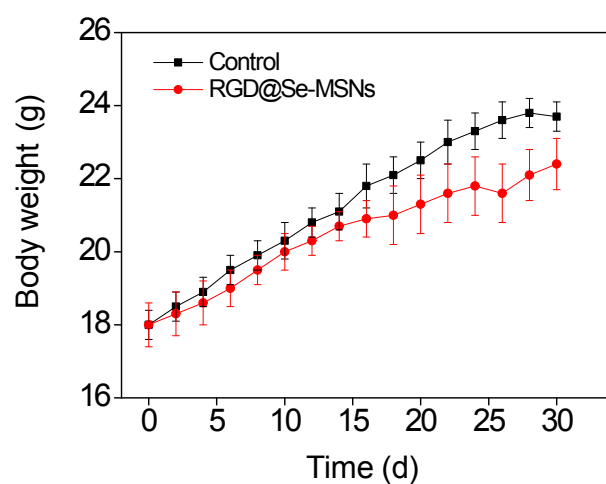

**Figure S8.** The body weight of nude mice after treated with RGD@Se-MSNs for 30 days.

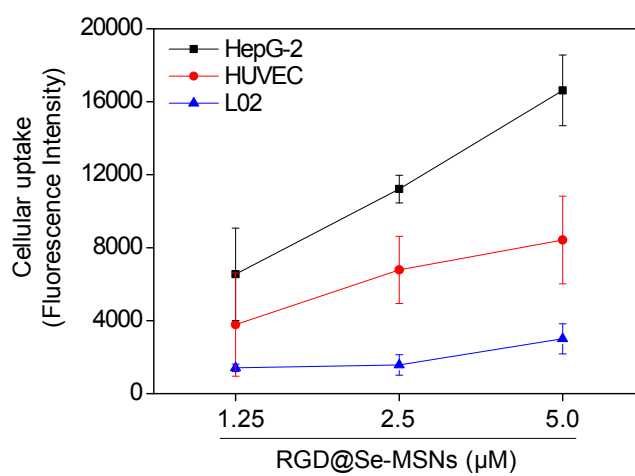

**Figure S9.** Cellular uptake efficiency of RGD@Se-MSNs in HepG-2, HUVEC and L02 cells (6 h).

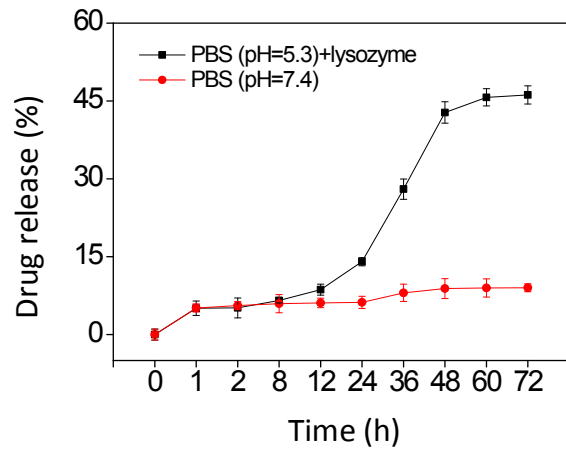

**Figure S10.** *In vitro* drug release curve from RGD@Se-MSNs (1 mg/ml) in PBS.

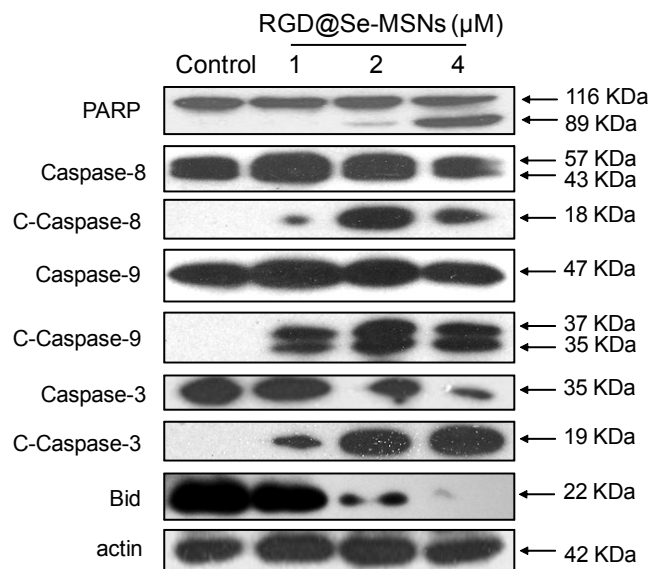

**Figure S11.** Western blotting showing the expression levels of the apoptosis relevant proteins in HUVEC cells after treated by RGD@Se-MSNs for 24 h.

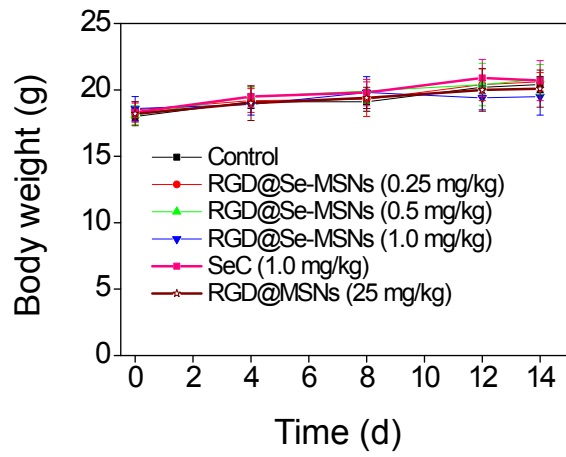

**Figure S12.** The body weight of nude mice after treatment with RGD@Se-MSNs, SeC and RGD@MSNs for two weeks.

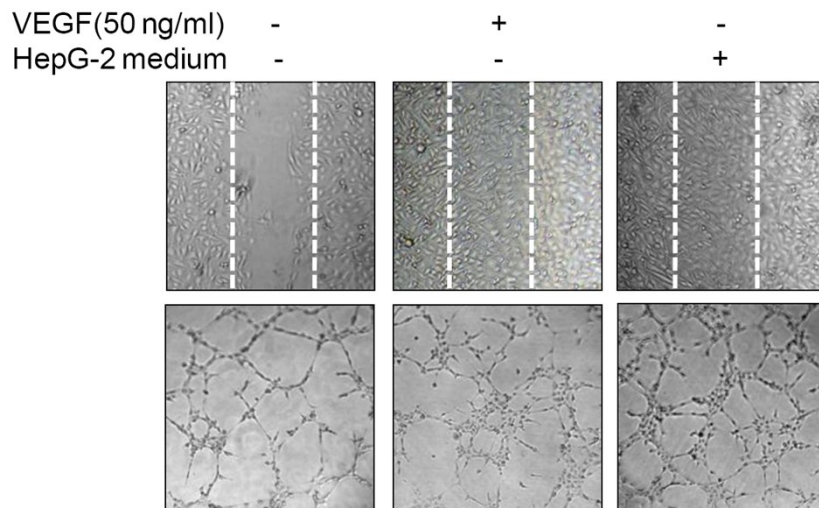

**Figure S13.** VEGF and HepG-2 culture medium induces HUVEC cell migration and tube formation *in vitro*.

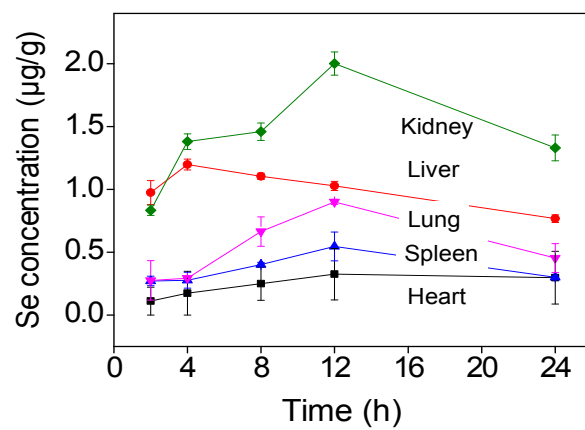

**Figure S14.** Biodistribution of Se in main organs within 24 h.
